# Supplementary material for: Zinc ion-triggered two-way macro-/microscopic shape changing and memory effects in high strength hydrogels with pre-programmed unilateral patterned surfaces
Source: Royal Society of Chemistry journal article supplement (doi:10.1039/c2sm07364a), 2012-01-01
Supplement: c2sm07364a.pdf [file c2sm07364a.pdf]

## Supporting Information

### **Zinc ion-triggered two-way macro-/microscopic shape changing and memory effects in high strength hydrogels with preprogrammed unilateral patterned surfaces**

Tao Bai, Yanjiao Han, Peng Zhang, Wei Wang, Wenguang Liu\*

School of Materials Science and Engineering, Tianjin Key Laboratory of Composite and Functional Materials, Tianjin University, Tianjin 300072, PR China

E-mail: wgliu@tju.edu.cn

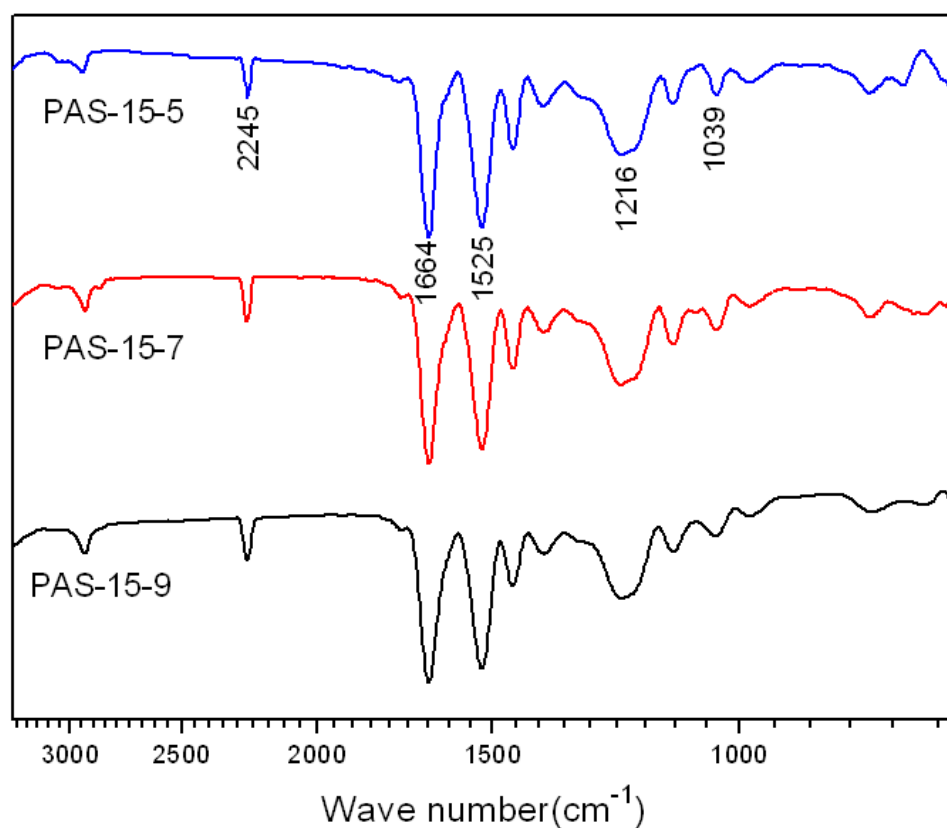

**Figure S1.** ATR-FTIR spectra of DDR hydrogel.
